# Supplementary material for: Distinct BTK inhibitors differentially induce apoptosis but similarly suppress chemotaxis and lipid accumulation in mantle cell lymphoma
Source: PubMed Central journal article supplement (PMC8235860; doi:10.1186/s12885-021-08475-3), 2021-06-26
Supplement: 12885_2021_8475_MOESM2_ESM.pdf [file 12885_2021_8475_MOESM2_ESM.pdf]

## Additional file 2: Supplementary Appendix

Supplement to: Zhuojun Liu, et al., Distinct BTK inhibitors differentially induce apoptosis but similarly suppress chemotaxis and lipid accumulation in mantle cell lymphoma.

**Supplementary Table 1.** The primers used for qRT-PCR validation.

| Gene name      | Primer sequence |                              |
|----------------|-----------------|------------------------------|
| <i>GADD45A</i> | Forward         | 5'-CTGGAGGAAGTGCTCAGCAAAG    |
|                | Reverse         | 5'-AGAGCCACATCTCTGTCGTCGT    |
| <i>ATM</i>     | Forward         | 5'-TGTTCCAGGACACGAAGGGAGA    |
|                | Reverse         | 5'-CAGGGTTCTCAGCACTATGGGA    |
| <i>HRK</i>     | Forward         | 5'-CCACAGCACTGCTAGTTCCA      |
|                | Reverse         | 5'-TCCCCGGGGCCTTATAGAAA      |
| <i>DGAT2</i>   | Forward         | 5'-GCTACAGGTCATCTCAGTGCTC    |
|                | Reverse         | 5'-GTGAAGTAGAGCACAGCGATGAG   |
| <i>ENPP2</i>   | Forward         | 5'-TATGCTGCGGAAACTCGTCAGG    |
|                | Reverse         | 5'-GACGTTGACACACCGATGCAGT    |
| <i>SCD</i>     | Forward         | 5'-CCTGGTTTCACTTGGAGCTGTG    |
|                | Reverse         | 5'-GTGGTGAAGTTGATGTGCCAGC    |
| <i>ACACA</i>   | Forward         | 5'-TTCACCTCCACCTTGTGTCAGCGGA |
|                | Reverse         | 5'-GTCAGAGAAGCAGCCCATCACT    |
| <i>GAPDH</i>   | Forward         | 5'-GTCTCCTCTGACTTCAACAGCG    |
|                | Reverse         | 5'-ACCACCCTGTTGCTGTAGCCAA    |
